# Supplementary material for: Neutrophil myeloperoxidase diminishes the toxic effects and mortality induced by lipopolysaccharide
Source: PubMed Central journal article supplement — J Exp Med. 2017 May 1;214(5):1249–58. doi: 10.1084/jem.20161238 (PMC5413333; doi:10.1084/jem.20161238), 2017-05-01
Supplement: JEM_20161238_sm.pdf [file JEM_20161238_sm.pdf]

SUPPLEMENTAL MATERIAL

Reber et al., <https://doi.org/10.1084/jem.20161238>

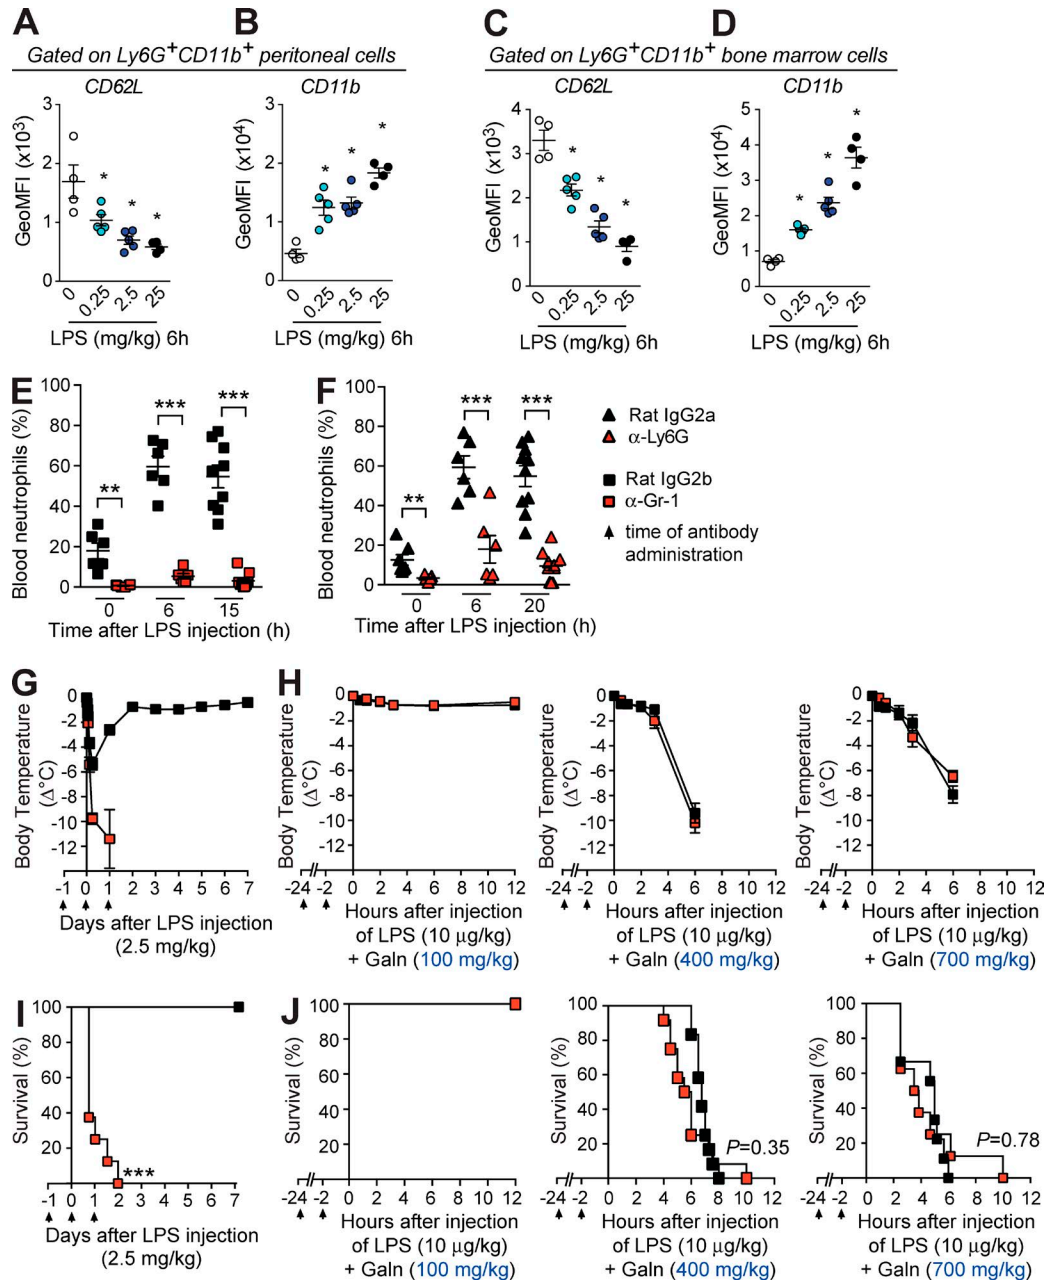

Figure S1. **Phenotype of neutrophils in the peritoneum and BM after LPS injection, and effect of treatment with neutrophil-depleting antibodies in models of LPS- or LPS/D-galactosamine-induced endotoxemia.** (A–D) Levels of CD62L (A and C) and CD11b (B and D; depicted as geometric mean fluorescence intensity [GeoMFI]) on Ly6G<sup>+</sup> CD11b<sup>+</sup> peritoneal (A and B) or BM (C and D) neutrophils 6 h after injection of various concentrations of LPS (as indicated). Results in A–D show values from individual mice; bars indicate means ± SEM pooled from two independent experiments (total  $n = 4\text{--}5$ /group). \*,  $P < 0.05$  versus control 0 group by two-tailed Mann–Whitney  $U$  test. (E and F) Percentage of Gr-1<sup>high</sup> CD11b<sup>+</sup> blood neutrophils at the indicated time point after injection of 25 mg/kg LPS in C57BL/6J mice treated i.p. with an anti-Ly6G neutrophil-depleting antibody (clone 1A8; 500 μg/injection) or an isotype control antibody (rat IgG2a; E) and in C57BL/6J mice treated i.p. with an anti-Gr-1 neutrophil-depleting antibody (clone RB6-8C5; 300 μg/injection) or an isotype control antibody (rat IgG2b; F). Data in E and F are pooled from three independent experiments (total  $n = 10\text{--}12$ /group). \*\*,  $P < 0.01$ ; \*\*\*,  $P < 0.001$  versus the corresponding isotype control group by two-tailed Mann–Whitney  $U$  test. (G–J) Changes in body temperature (Δ°C [mean ± SEM]; G and H) and survival (percentage of live animals; I and J) after injection of 2.5 mg/kg LPS (G and I) or 10 μg/kg LPS together with the indicated concentration of D-galactosamine (Galn; H and J) in C57BL/6J mice treated i.p. with an anti-Gr-1 neutrophil-depleting antibody (clone RB6-8C5; 300 μg/injection) or an isotype control antibody (rat IgG2b). Data in G–J are pooled from two or three independent experiments (total  $n = 8\text{--}12$ /group). \*\*\*,  $P < 0.001$  versus the corresponding isotype control group by Mantel–Cox log-rank test. Arrows in G–J indicate time of i.p. injection of the neutrophil-depleting or isotype control antibodies.

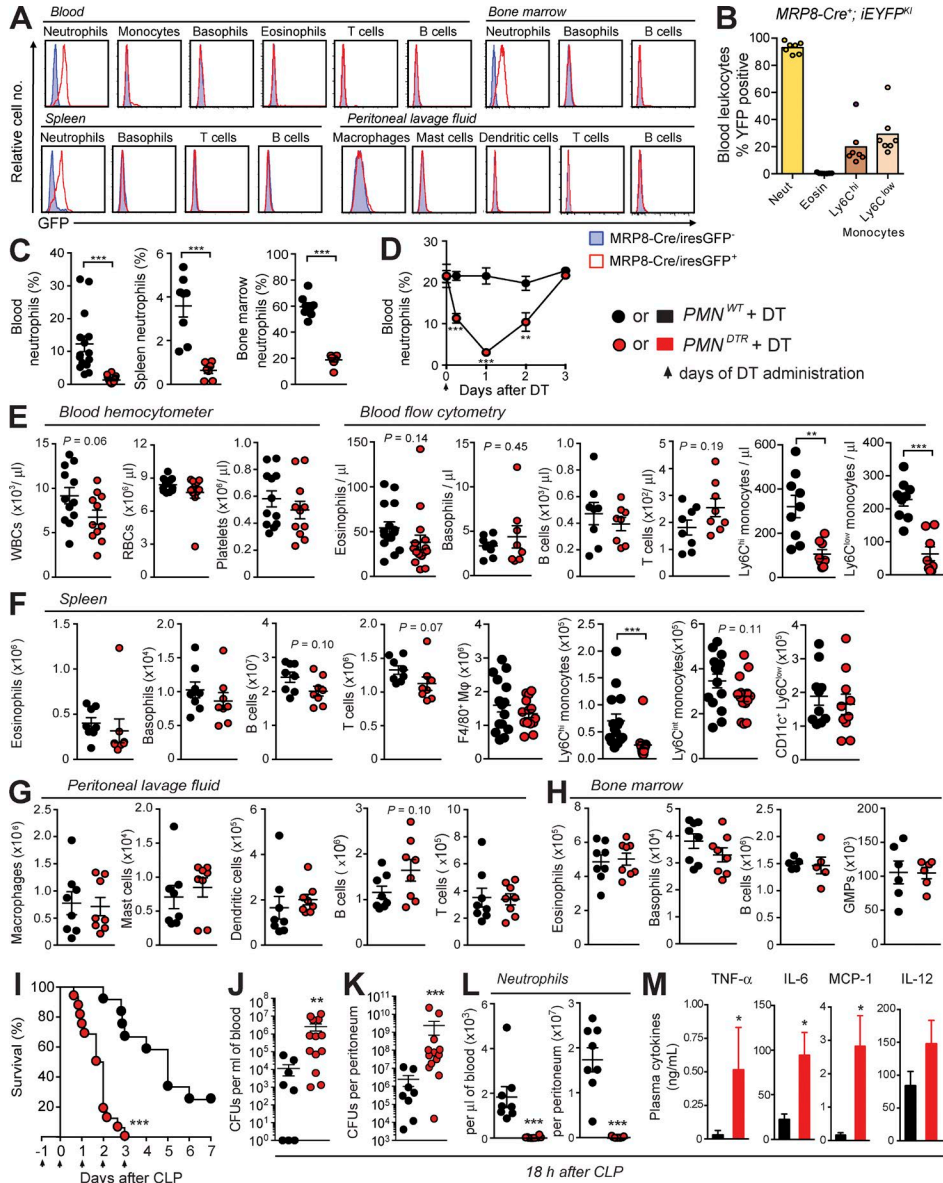

Figure S2. Analysis of GFP expression in various immune cell types from *MRP8-Cre/IRES-GFP* mice, levels of various cell populations 24 h after DT injection into *PMN<sup>DTR</sup>* mice, and responses of *PMN<sup>DTR</sup>* mice in the CLP model of polymicrobial sepsis. (A) Analysis of GFP expression (mean fluorescence intensity) in the indicated cell populations in *MRP8-Cre/IRES-GFP* and *MRP8-Cre/IRES-GFP<sup>+</sup>* mice. Results are representative of three independent experiments. (B) Analysis of YFP expression in myeloid leukocytes from the blood of *MRP8-Cre/IRES-GFP<sup>+</sup>* × *ROSA-iEYFP<sup>KI</sup>* reporter mice, graphed as percentage YFP<sup>+</sup> of the indicated populations. Values from individual mice are shown; bars indicate means pooled from two independent experiments (total *n* = 7). Neut, neutrophils; Eosin, eosinophils. (C) Percentage of blood, spleen, and BM neutrophils 24 h after i.p. injection of 500 ng DT into *PMN<sup>DTR</sup>* mice and *PMN<sup>WT</sup>* littermate control mice. (D) Percentage of blood neutrophils at the indicated time points after i.p. injection of DT on day 0. Results in D are means ± SEM from *n* = 3–8 mice per group pooled from two or three independent experiments. (E–H) Numbers of various cell populations in blood (E), spleen (F), peritoneal lavage fluid (G), and BM (H) from *PMN<sup>DTR</sup>* mice and *PMN<sup>WT</sup>* littermate control mice 24 h after i.p. injection of 500 ng DT, determined by hemocytometer measurements or flow cytometry. Results in C and E–H show values from individual mice; bars indicate means ± SEM pooled from two independent experiments for blood monocytes and spleen monocyte-derived DCs (moDCs; CD11b<sup>+</sup>CD11c<sup>+</sup>Ly6C<sup>low</sup>; total *n* = 8–10/group) and BM B cells (total *n* = 5/group), four experiments for blood neutrophils (B; total *n* = 15–16/group), or three independent experiments for all other cell populations (total *n* = 7–15/group). *P*-values <0.3 are indicated (two-tailed Mann–Whitney *U* test). WBCs, white blood cells; RBCs, red blood cells; Mφ, macrophages. (I–M) Responses of DT-treated *PMN<sup>DTR</sup>* versus *PMN<sup>WT</sup>* mice in the CLP model of polymicrobial sepsis. (I) Survival after CLP (*n* = 12–16). (J–L) Numbers of bacterial CFUs in the blood (J) and peritoneal lavage fluid (K) and numbers of blood and peritoneal neutrophils (L) 18 h after CLP (*n* = 8–13/group). (M) Levels of TNF-α, IL-6, MCP-1, and IL-12 in the plasma 18 h after CLP (*n* = 7–8/group). Results in J–L show values from individual mice; bars indicate means ± SEM; results in M are means + SEM. Data in I–M are pooled from three independent experiments. \*, *P* < 0.05; \*\*, *P* < 0.01; \*\*\*, *P* < 0.001 versus *PMN<sup>WT</sup>* group by Mantel–Cox log-rank test (I) or Mann–Whitney *U* test (J–M). Arrows in D and I indicate days of i.p. injection of the neutrophil-depleting or isotype control antibodies.

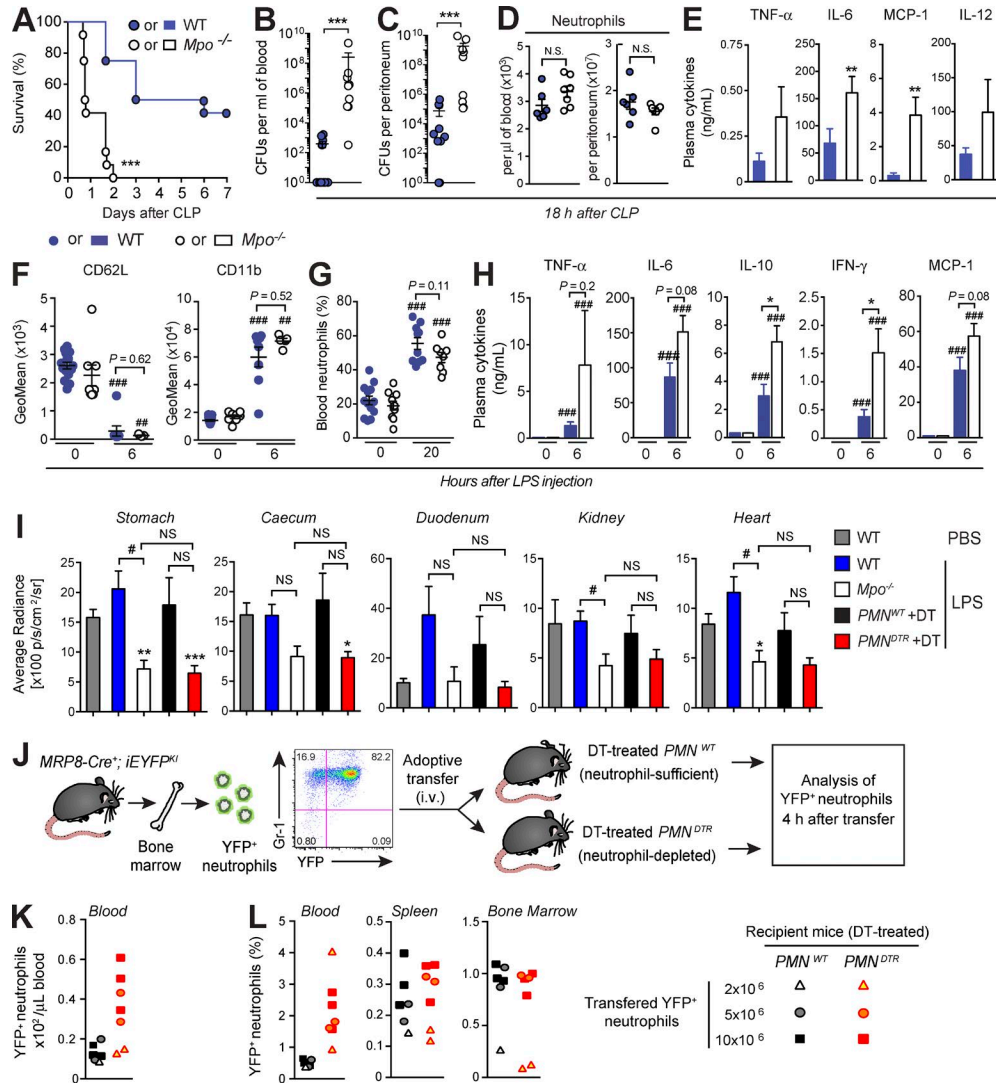

Figure S3. Responses of MPO-deficient mice in models of polymicrobial sepsis and LPS-induced endotoxemia, systemic quantification of MPO-induced bioluminescence, and levels of neutrophils after adoptive transfer in *PMN*<sup>WT</sup> versus *PMN*<sup>DTR</sup> mice. (A–E) Responses of *Mpo*<sup>-/-</sup> versus WT mice in the CLP model of polymicrobial sepsis. (A) Survival after CLP ( $n = 12$ ). (B–E) Numbers of bacterial CFUs in the blood (B) and peritoneal lavage fluid (C;  $n = 9–11$ /group), numbers of blood and peritoneal neutrophils (D;  $n = 6–7$ /group), and levels of TNF- $\alpha$ , IL-6, MCP-1, and IL-12 in the plasma 18 h after CLP ( $n = 9–11$ /group). Results in B–D show values from individual mice; bars indicate means  $\pm$  SEM; results in E are means  $\pm$  SEM. Data in A–E are pooled from two (D) or three (A–C and E) independent experiments. \*\*,  $P < 0.01$ ; \*\*\*,  $P < 0.001$  versus WT group by Mantel–Cox log-rank test (A) or Mann–Whitney  $U$  test (B–E). (F) Quantification of CD62L and CD11b levels (geometric mean fluorescence intensity [GeoMean]) on Ly6G<sup>+</sup> CD11b<sup>+</sup> blood neutrophils before (time 0) or 6 h after injection of LPS in WT or *Mpo*<sup>-/-</sup> mice. (G) Percentage of blood neutrophils before (time 0) and 20 h after LPS injection (25 mg/kg) in WT and *Mpo*<sup>-/-</sup> mice. F and G show values from individual mice; bars indicate means  $\pm$  SEM pooled from two (F) or three (G) independent experiments (total  $n = 5–15$ /group). (H) Levels of TNF- $\alpha$ , IL-6, IL-10, IFN- $\gamma$ , and MCP-1 in the plasma of WT and *Mpo*<sup>-/-</sup> mice before (time 0) and 6 h after LPS injection. Data in H are means  $\pm$  SEM (total  $n = 8–12$ /group from three independent experiments). \*,  $P < 0.05$  versus WT group and \*\*,  $P < 0.01$ ; \*\*\*,  $P < 0.001$  versus the same group at time 0 by Mann–Whitney  $U$  test. (I) Quantification of MPO-induced bioluminescence in the stomach, cecum, duodenum, kidney, and heart 6 h after i.p. injection of PBS (in WT mice) or LPS (25 mg/kg) in WT mice, *Mpo*<sup>-/-</sup> mice, DT-treated *PMN*<sup>DTR</sup> mice, and DT-treated *PMN*<sup>WT</sup> littermate controls, and 5 min after luminol injection. Data are means  $\pm$  SEM from three independent experiments (total  $n = 6–14$ /group) except for *Mpo*<sup>-/-</sup> mice (two independent experiments with a total of three to four mice). \*,  $P < 0.05$ ; \*\*,  $P < 0.01$ ; \*\*\*,  $P < 0.001$  versus PBS-treated WT group, and #,  $P < 0.05$  versus corresponding LPS-treated control group by unpaired Student’s  $t$  test. N.S., not significant ( $P > 0.05$ ). (J–L) Levels of neutrophils after adoptive transfer into DT-treated *PMN*<sup>DTR</sup> or *PMN*<sup>WT</sup> mice. (J) Experimental outline. We purified BM neutrophils by negative selection using a commercially available kit. Purified cells were >95% Gr-1<sup>+</sup> CD11b<sup>+</sup> (as shown in J) and >90% Ly6G<sup>+</sup> CD11b<sup>+</sup> (not depicted) on average for all adoptive transfer experiments (Fig. 3 and panels K and L). Cells were >80% YFP<sup>+</sup> on average for all adoptive transfer experiments (K and L). Various numbers of purified neutrophils were transferred i.v. into DT-treated *PMN*<sup>DTR</sup> mice (in which endogenous YFP<sup>-</sup> neutrophils were depleted) or DT-treated *PMN*<sup>DTR</sup> mice (which contained endogenous YFP<sup>-</sup> neutrophils). 4 h after adoptive transfer, levels of YFP<sup>+</sup> neutrophils (Ly6G<sup>+</sup> CD11b<sup>+</sup>) were analyzed by flow cytometry in the blood (K and L), spleen and BM (L).
